# Supplementary material for: Measurement report: Long-term variations in surface NO x and SO 2 mixing ratios from 2006 to 2016 at a background site in the Yangtze River Delta region, China
Source: Copernicus journal article supplement (doi:10.5194/acp-22-1015-2022), 2022-01-21
Supplement: Supplementary file 1 [file acp-22-1015-2022-supplement.pdf]

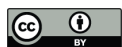

*Supplement of*

**Measurement report: Long-term variations in surface  $\text{NO}_x$  and  $\text{SO}_2$  mixing ratios from 2006 to 2016 at a background site in the Yangtze River Delta region, China**

**Qingqing Yin et al.**

*Correspondence to:* Weili Lin ([linwl@muc.edu.cn](mailto:linwl@muc.edu.cn))

The copyright of individual parts of the supplement might differ from the article licence.

### **The levels of NO, NO<sub>2</sub> and NO<sub>x</sub>.**

As shown in the Tab. S1, the average annual mixing ratio of NO, NO<sub>2</sub> and NO<sub>x</sub> at LAN over the 11 years is 1.1 ppb, 12.5 ppb and 13.6 ppb, respectively. The average ratio of NO<sub>2</sub>/NO<sub>x</sub> is 0.92, which indicates that NO<sub>2</sub> accounts for a huge percentage of NO<sub>x</sub> and is dominated by ageing air masses locally. It can also be seen from Table S1 that the annual average NO<sub>2</sub> mixing ratio follows roughly the same trend as NO<sub>x</sub>, so we have discussed the long-term NO<sub>x</sub> variations in the manuscript and long-term NO<sub>2</sub> variations in the supplement.

**Table S1. Statistics of NO, NO<sub>2</sub> and NO<sub>x</sub> levels from 2006 to 2016 at LAN.**

| year    | NO  | NO <sub>2</sub> | NO <sub>x</sub> | NO <sub>2</sub> /NO <sub>x</sub> |
|---------|-----|-----------------|-----------------|----------------------------------|
| 2006    | 0.8 | 12.1            | 12.9            | 0.94                             |
| 2007    | 1.1 | 12.7            | 13.8            | 0.92                             |
| 2008    | 1.0 | 12.0            | 13.0            | 0.92                             |
| 2009    | 1.0 | 12.1            | 13.1            | 0.92                             |
| 2010    | 1.6 | 12.5            | 14.1            | 0.87                             |
| 2011    | 1.3 | 14.1            | 15.4            | 0.92                             |
| 2012    | 1.6 | 13.8            | 15.4            | 0.90                             |
| 2013    | 1.0 | 13.5            | 14.5            | 0.93                             |
| 2014    | 0.8 | 12.1            | 12.9            | 0.94                             |
| 2015    | 1.0 | 11.0            | 12.0            | 0.92                             |
| 2016    | 1.1 | 11.1            | 12.2            | 0.91                             |
| average | 1.1 | 12.5            | 13.6            | 0.92                             |

### Monthly average NO<sub>2</sub> and NO mixing ratios.

As shown in the Fig. S1, the average seasonal variation in NO<sub>2</sub> and NO is similar, with highest level in December ( $20.3 \pm 3.6$  ppb and  $3.1 \pm 1.2$  ppb) and lowest in July ( $6.5 \pm 0.6$  ppb) and June ( $0.5 \pm 0.2$  ppb), respectively.

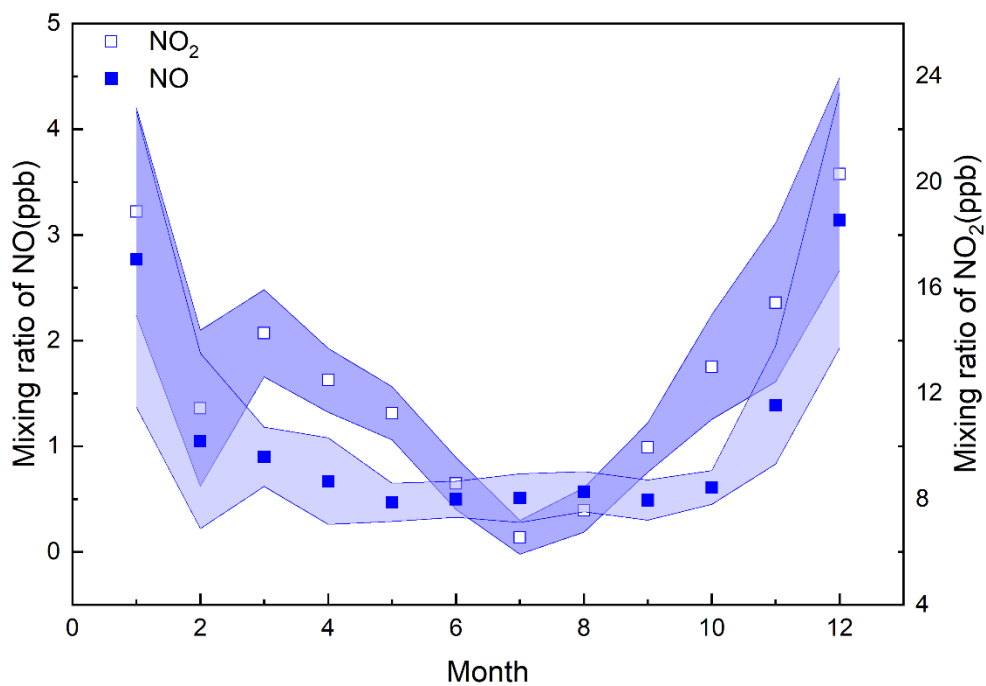

**Figure S1: Monthly average NO<sub>2</sub> and NO mixing ratios at LAN. The shadows represent 1 standard deviation calculated from monthly means.**

### Diurnal variations in NO<sub>2</sub> and NO mixing ratios.

As shown in Fig.S2, an evident NO peak at 9:00 am during morning rush hours indicates the presence of fresh emissions mainly from vehicle emissions.

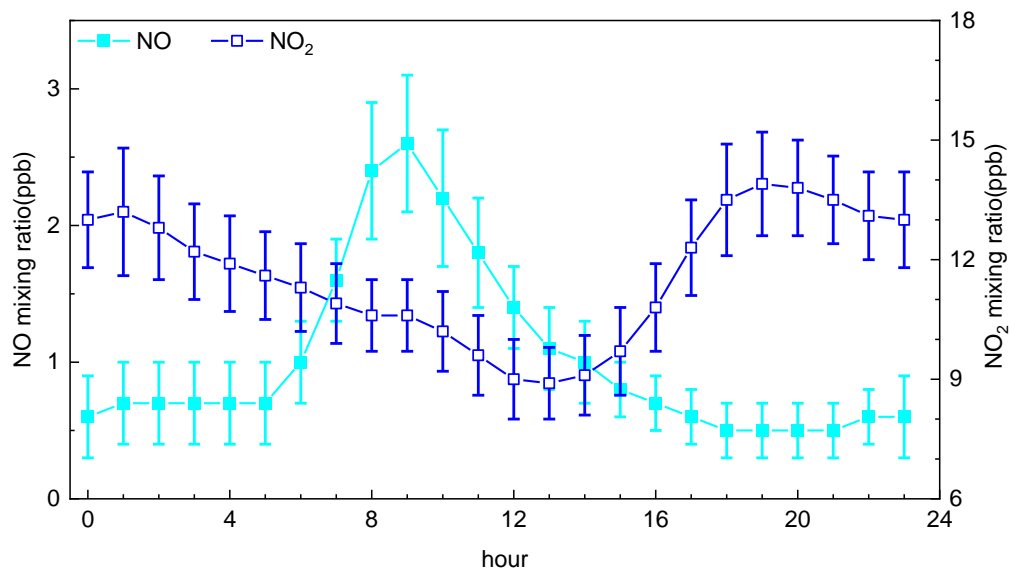

Figure S2: Annual average diurnal variations in NO (left axis) and in NO<sub>2</sub> (right axis) at LAN.

### Annual mean NO<sub>2</sub> mixing ratio at LAN compared with OMI NO<sub>2</sub> vertical column density over YRD.

We compared the long-term trends in LAN NO<sub>2</sub> mixing ratio with OMI NO<sub>2</sub> vertical column density (Fig.S3a) and found significant correlations between the two (Fig.S3b,  $P < 0.01$ ), which indicate a good regional representativeness of LAN measurements. In the Fig.S3a, the percentage changes of NO<sub>2</sub> in LAN and OMI are +2.23%/yr ( $P = 0.17$ ) and +5.87%/yr ( $P < 0.01$ ) from 2006 to 2011 (based on 2006), respectively. And the percentage changes of the two are -4.98%/yr ( $P < 0.01$ ) and -4.22%/yr ( $P < 0.01$ ) from 2011 to 2016 (based on 2011), respectively.

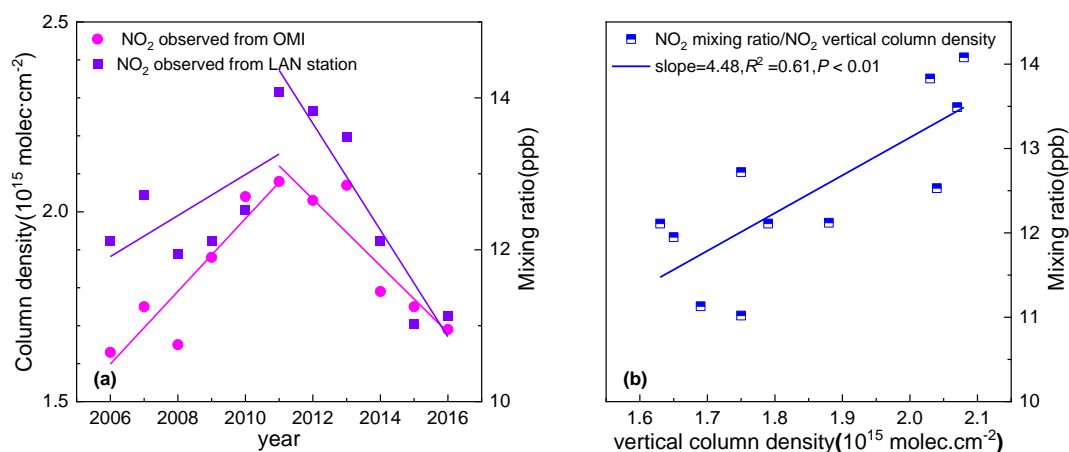

Figure S3: Annual mean NO<sub>2</sub> mixing ratio at LAN (a, right axis) compared with OMI NO<sub>2</sub> vertical column density over YRD (a, left axis) and the linear fit of both (b).
